# Supplementary material for: Fission yeast Tor1 functions as part of TORC1 to control mitotic entry through the stress MAPK pathway following nutrient stress
Source: Oxford University Press journal article supplement (doi:10.1242/jcs.049387), 2009-05-06
Supplement: jcs049387-sup-049387-tables1.pdf [file jcs049387-sup-049387-tables1.pdf]

**Table S1.** Length at division (means $\pm$ s.e.m.) before and 120 minutes after

|       |                                                                     | Glutamate ( $\mu$ m) | Proline 120 minutes ( $\mu$ m) |
|-------|---------------------------------------------------------------------|----------------------|--------------------------------|
| JP3   | wt                                                                  | 13.1 $\pm$ 0.09      | 9.2 $\pm$ 0.08                 |
| JP657 | <i>tor1::ura4+ ura4.d18</i>                                         | 16.5 $\pm$ 0.25      | 16.4 $\pm$ 0.25                |
| JP690 | <i>sin1::ura4+ ura4.d18</i>                                         | 16.2 $\pm$ 0.16      | 14.2 $\pm$ 0.13                |
| JP692 | <i>ste20::ura4+ ura4.d18</i>                                        | 16.2 $\pm$ 0.18      | 14.3 $\pm$ 0.16                |
| JP658 | <i>tor1::ura4+ pyp2::KanMX6 ura4.d18</i>                            | 13.9 $\pm$ 0.17      | NA                             |
| JP577 | <i>sin1::ura4+ pyp2::KanMX6 ura4.d18</i>                            | 16.1 $\pm$ 0.18      | NA                             |
| JP667 | <i>ste20::ura4+ pyp2::KanMX6 ura4.d18</i>                           | 15.7 $\pm$ 0.15      | NA                             |
| JP598 | <i>gad8::ura4+ ura4.d18</i>                                         | 14.59 $\pm$ 0.1      | 14.55 $\pm$ 0.1                |
| JP600 | <i>gad8::ura4+ pyp2::KanMX6 ura4.d18</i>                            | 12.1 $\pm$ 0.1       | NA                             |
| JP763 | <i>mip1-15-flag mip1::ura4+ ura4.d18</i>                            | 12.2 $\pm$ 0.1       | 10.5 $\pm$ 0.08                |
| JP788 | <i>mip1-15-flag mip1::ura4+ pyp2::KanMX6 ura4.d18</i>               | 10.6 $\pm$ 0.08      | NA                             |
| JP760 | <i>mip1::mip1.310-ura4+ ura4.d18</i>                                | 13.4 $\pm$ 0.09      | 12.4 $\pm$ 0.1                 |
| JP790 | <i>mip1::mip1.310-ura4+ pyp2::KanMX6 ura4.d18</i>                   | 12.3 $\pm$ 0.08      | NA                             |
| JP801 | <i>gad8.S527A.S546A-6HA(KanMX6) gad8::ura4<sup>+</sup> ura4.d18</i> | 13.3 $\pm$ 0.08      | 12.8 $\pm$ 0.08                |

nutrient shift

|       |                                          | Msl +NH <sub>4</sub> (μm) | Msl -NH <sub>4</sub><br>120 minutes<br>(μm) |
|-------|------------------------------------------|---------------------------|---------------------------------------------|
| JP3   | wt                                       | 12.3±0.08                 | 8.1±0.06                                    |
| JP657 | <i>tor1::ura4+ ura4.d18</i>              | 16.2±0.18                 | 12.6±0.13                                   |
| JP598 | <i>gad8::ura4+ ura4.d18</i>              | 15.8±0.1                  | 13.0±0.14                                   |
| JP763 | <i>mip1-15-flag mip1::ura4+ ura4.d18</i> | 11.4±0.06                 | 7.9±0.06                                    |
| JP760 | <i>mip1::mip1.310-ura4+ ura4.d18</i>     | 12.3±0.08                 | 8.7±0.06                                    |
