# Supplementary figures and images for: Fission yeast Tor1 functions as part of TORC1 to control mitotic entry through the stress MAPK pathway following nutrient stress
Source: Oxford University Press journal article supplement (doi:10.1242/jcs.049387), 2009-05-06

## A Nutrient starvation

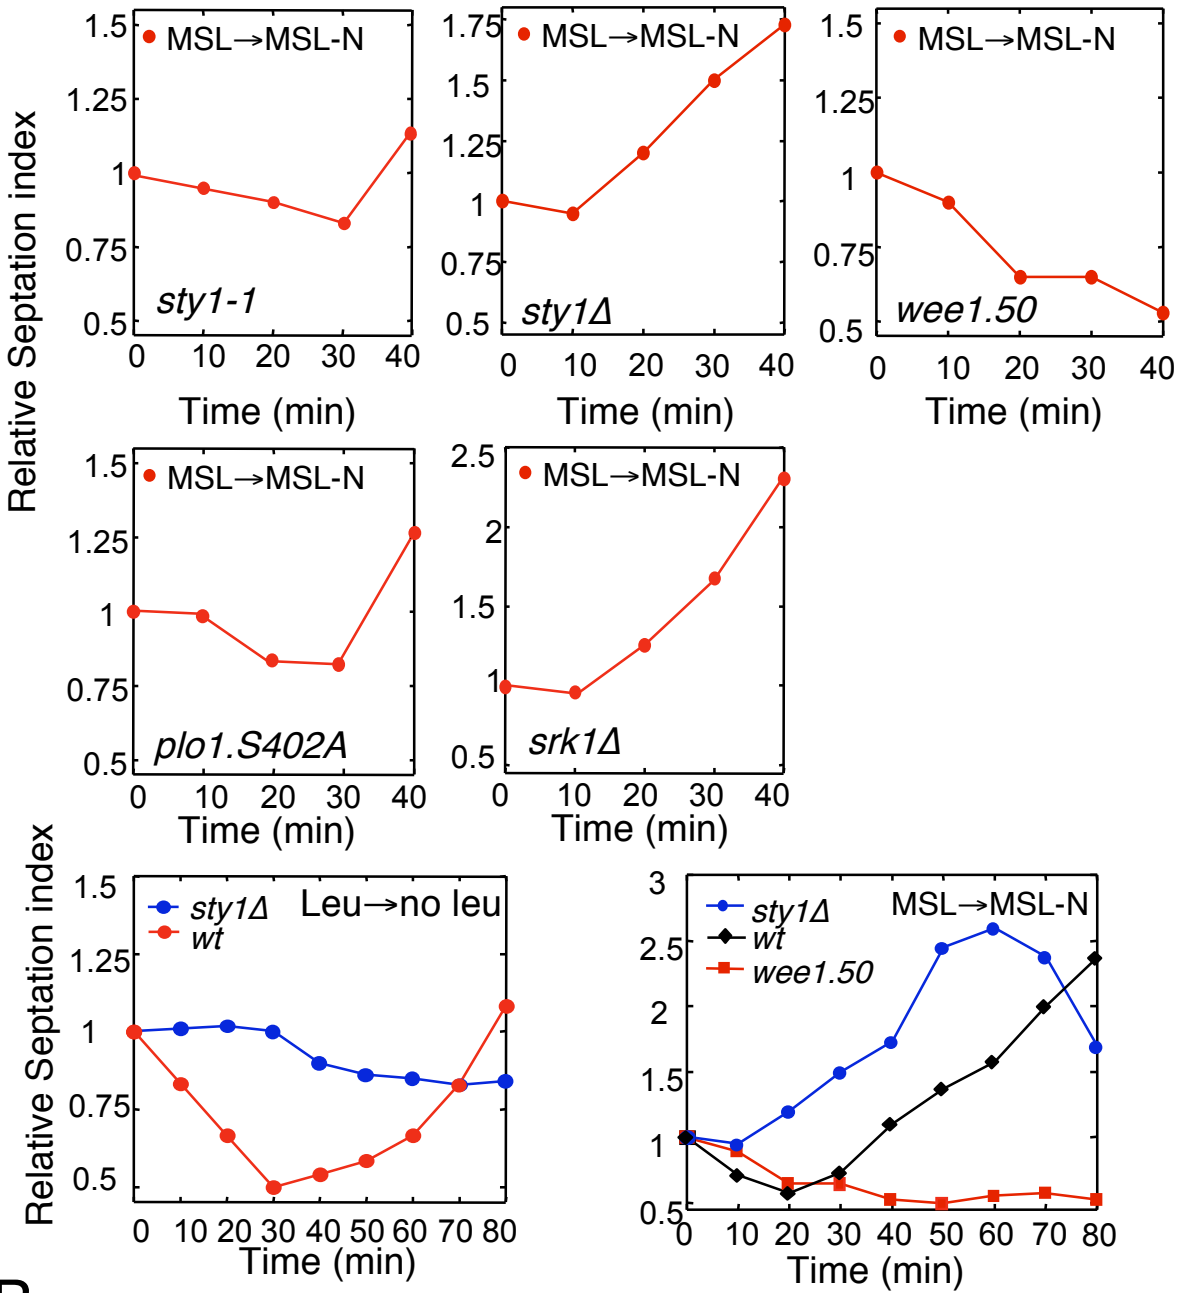

## B Nutrient stress

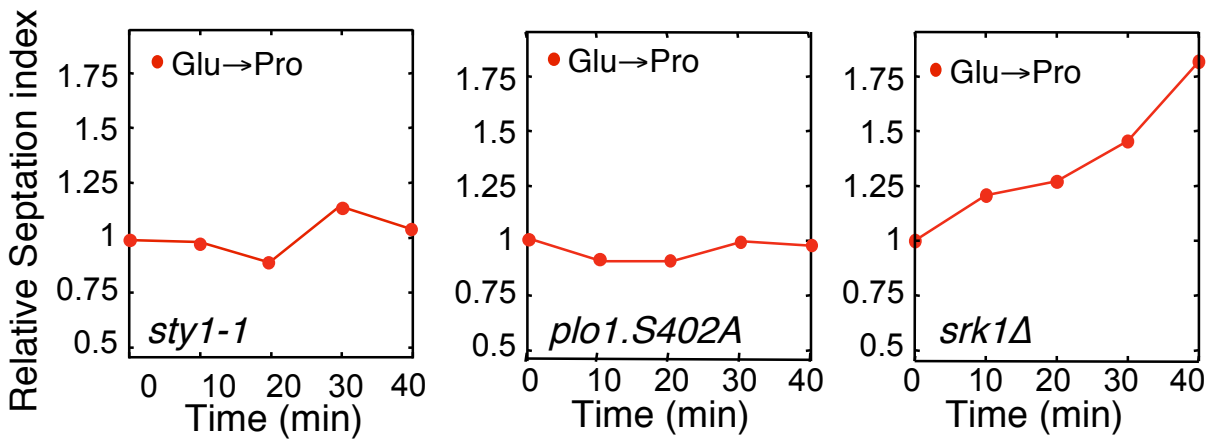

Supplement: jcs049387-sup-049387-figs1.pdf [file jcs049387-sup-049387-figs1.pdf]
